# Supplementary material for: Alkali–lanthanide heterometallic coordination polymers based on 2,2′-bipyridine-6,6′-dicarboxylate: synthesis, structure, and luminescent properties
Source: Royal Society of Chemistry journal article supplement (doi:10.1039/c2ce05828f), 2012-01-01
Supplement: c2ce05828f.pdf [file c2ce05828f.pdf]

## Electronic Supplementary Material (ESI) for CrystEngComm

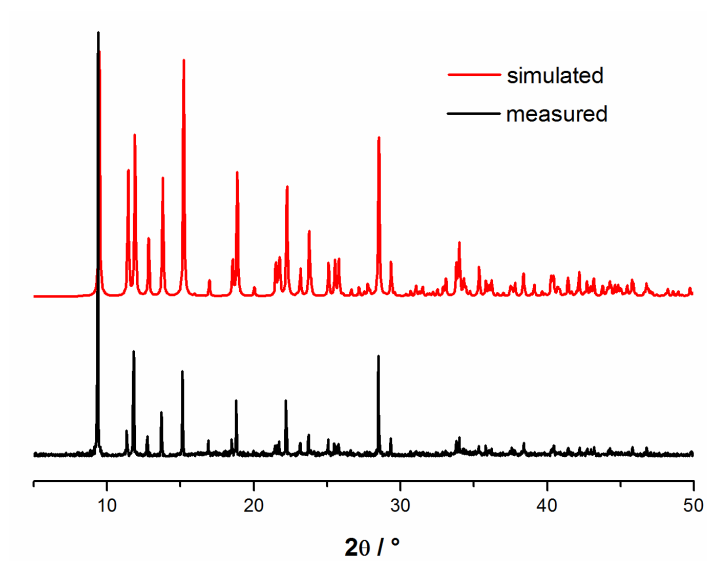

Fig. S1 Powder X-ray diffraction data of compound 1.

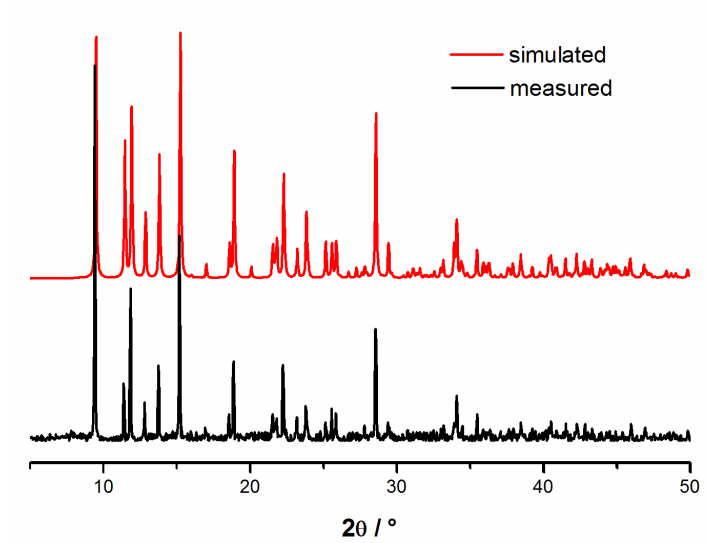

Fig. S2 Powder X-ray diffraction data of compound 2.

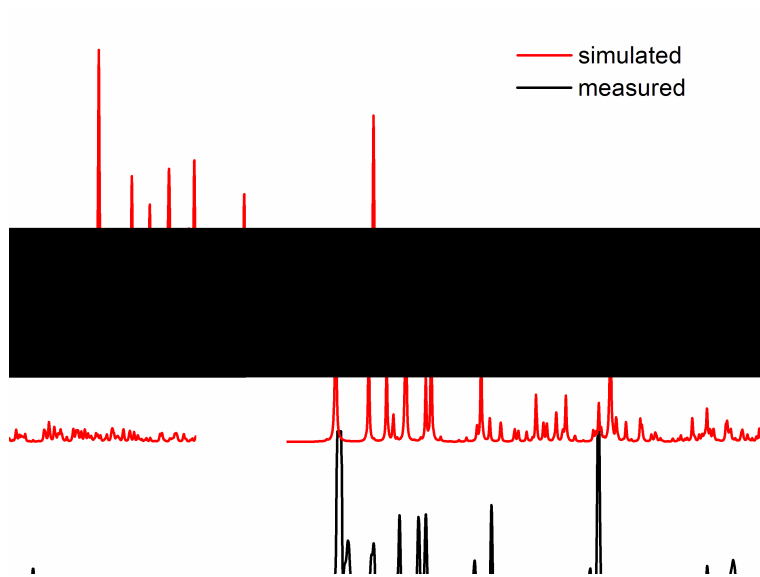

**Fig. S3** Powder X-ray diffraction data of compound 3.

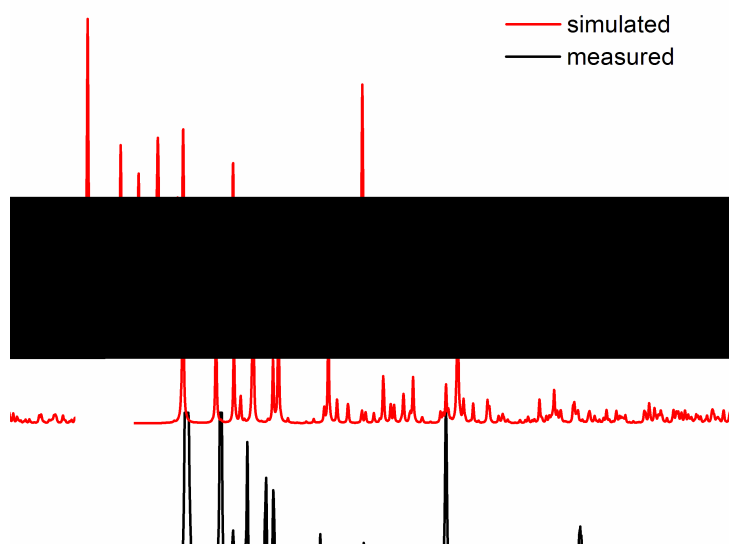

**Fig. S4** Powder X-ray diffraction data of compound 4.

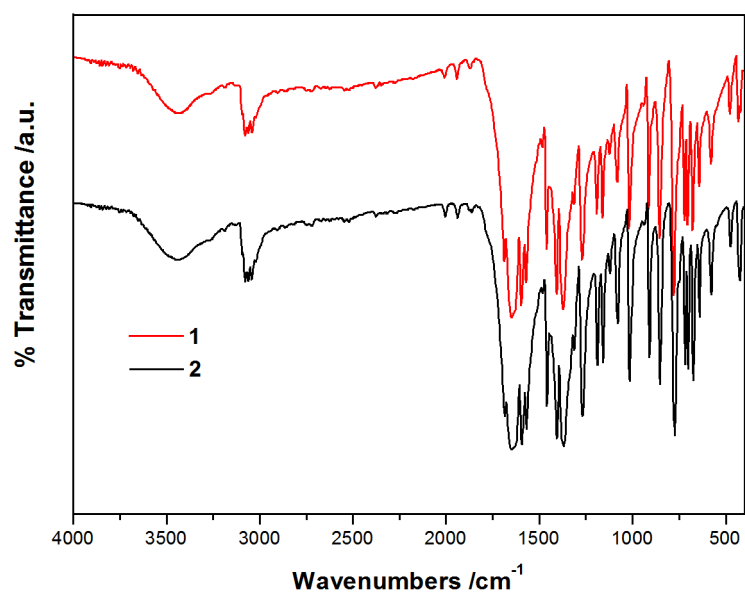

Fig. S5 IR spectra of compounds 1 and 2.

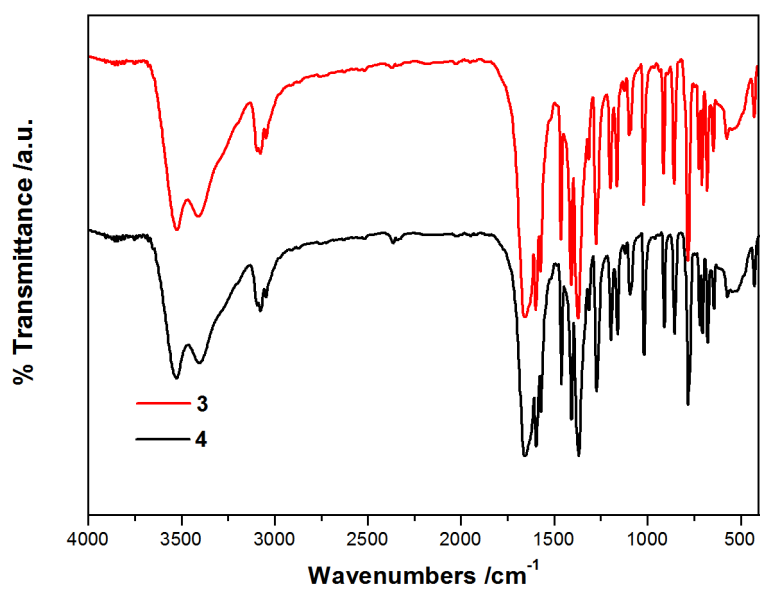

Fig. S6 IR spectra of compounds 3 and 4.

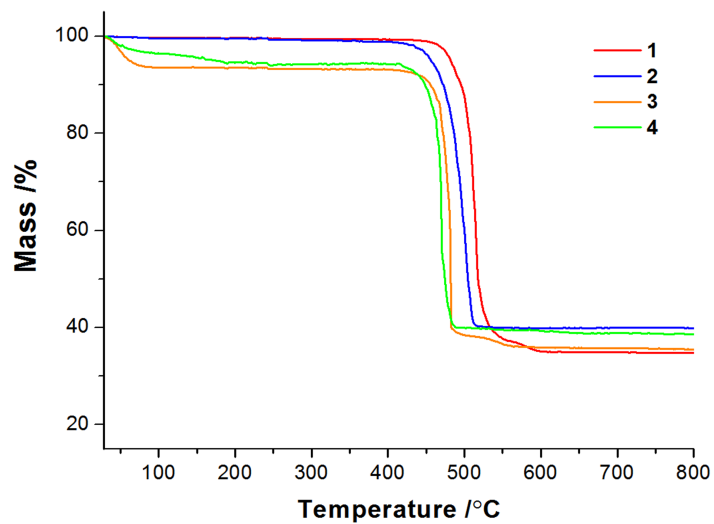

Fig. S7 Thermogravimetric curves of 1-4.

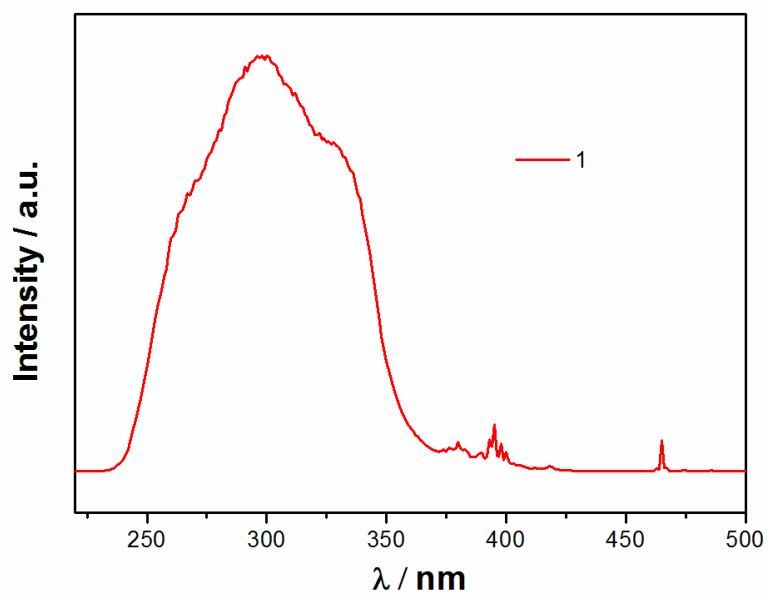

Fig. S8 The excitation spectra of compound 1 at room temperature ( $\lambda_{em} = 613$  nm).

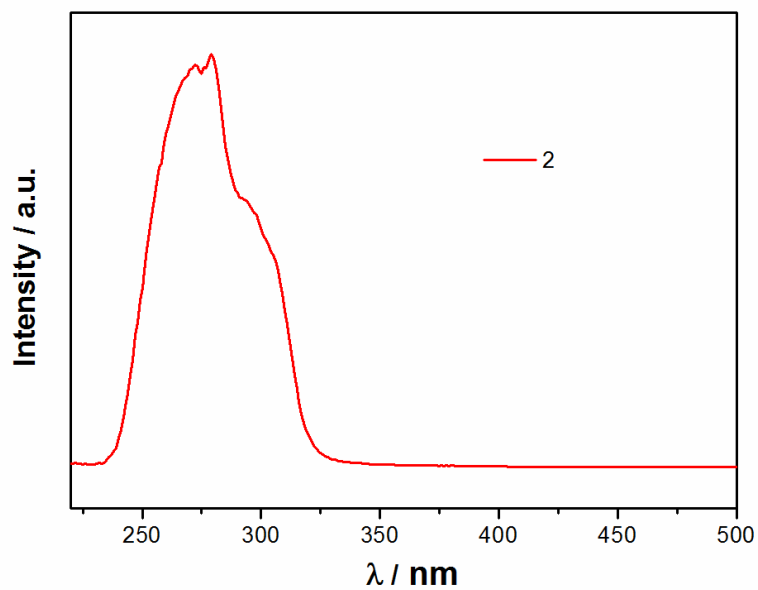

**Fig. S9** The excitation spectra of compound **2** at room temperature ( $\lambda_{em} = 583$  nm).

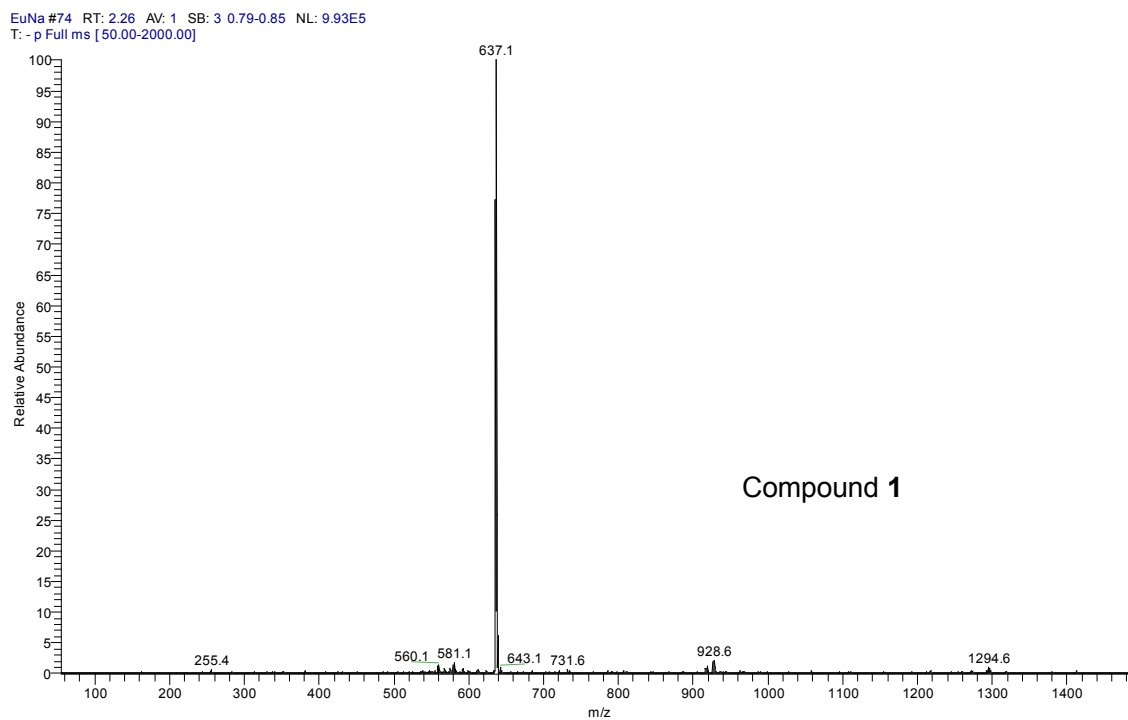

**Fig. S10** The ESI-MS spectrum of compound **1**.

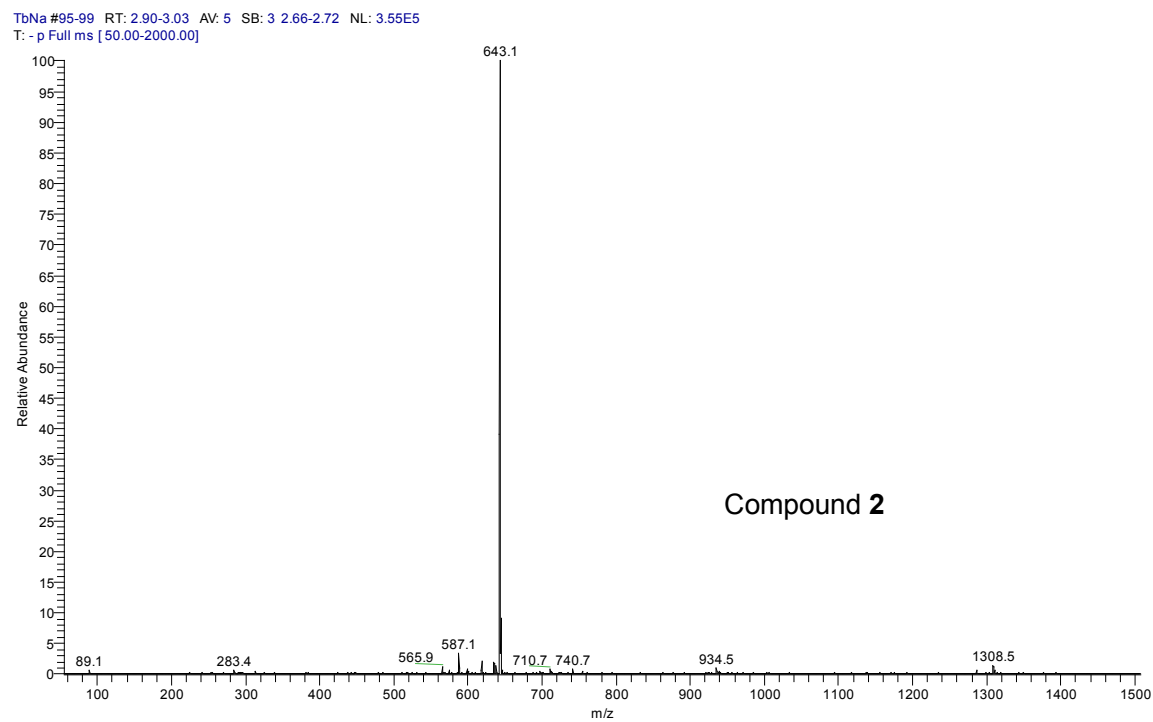

**Fig. S11** The ESI-MS spectrum of compound 2.

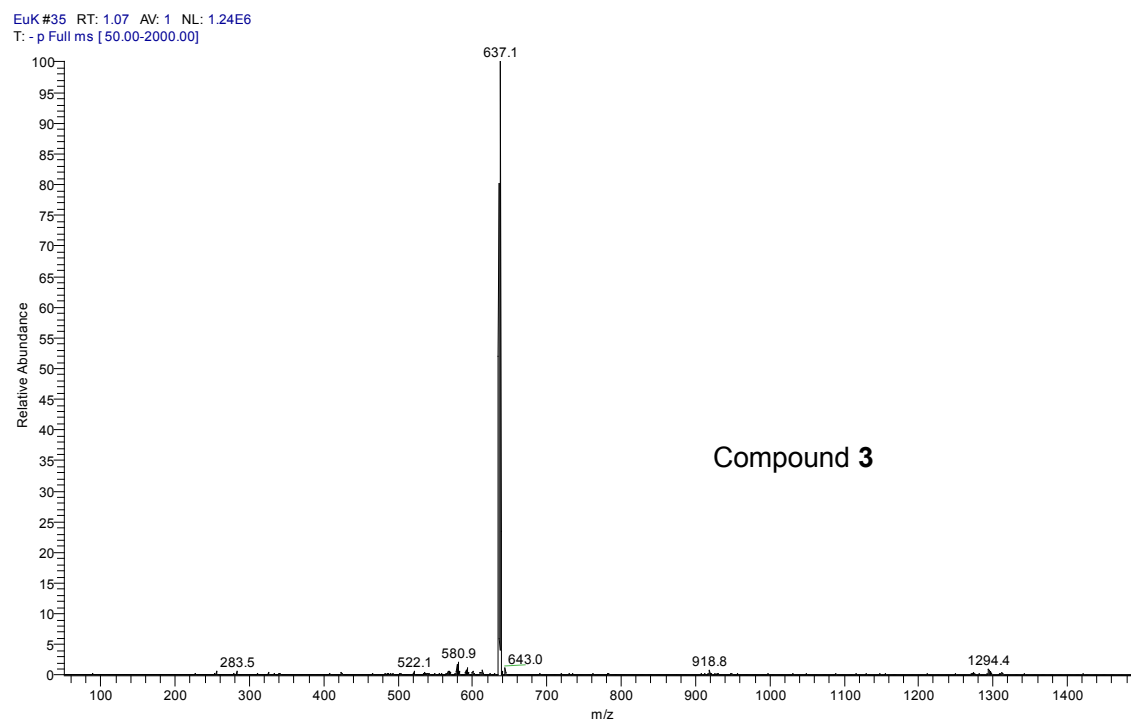

**Fig. S12** The ESI-MS spectrum of compound 3.

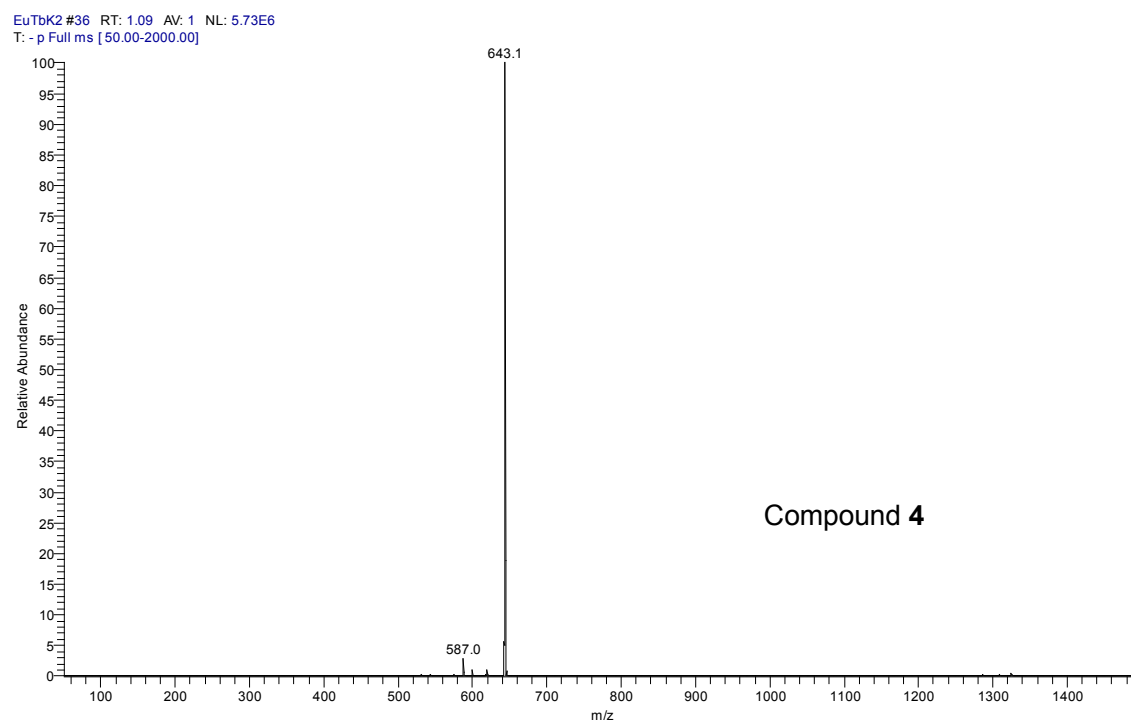

**Fig. S13** The ESI-MS spectrum of compound 4.
